# Supplementary material for: YB-1 regulates tumor growth by promoting MACC1/c-Met pathway in human lung adenocarcinoma
Source: PubMed Central journal article supplement (PMC5564630; doi:10.18632/oncotarget.18262), 2017-05-29
Supplement: oncotarget-08-48110-s001.pdf [file oncotarget-08-48110-s001.pdf]

## YB-1 regulates tumor growth by promoting MACC1/c-Met pathway in human lung adenocarcinoma

### SUPPLEMENTARY INFORMATION

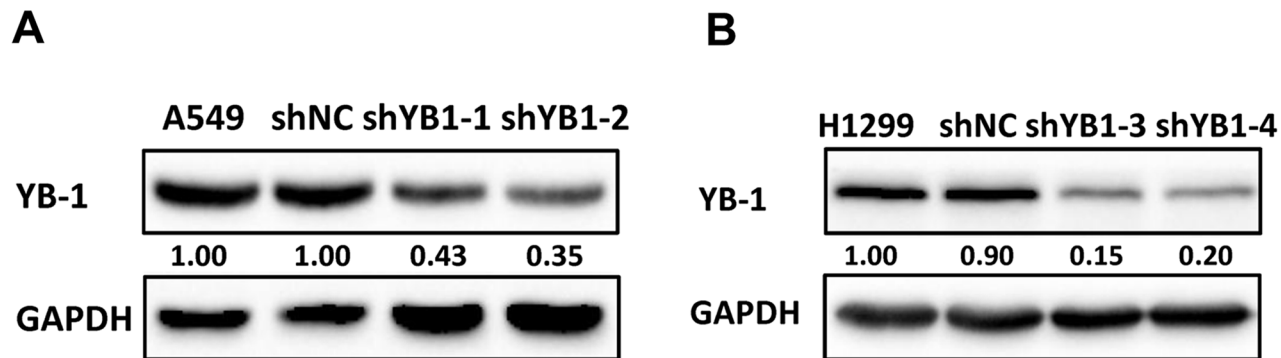

**Supplementary Figure 1: Efficiencies for knockdown of YB-1 were tested by western blot analysis.** The YB-1-silenced A549 cell clones (shYB1-1, shYB1-2) (A) and YB-1-silenced H1299 cell clones (shYB1-3, shYB1-4) (B) were selected after transfection using G418 (800 mg/L), then these stable cell lines were analyzed by Western Blotting assay to confirm the expression level of YB-1.

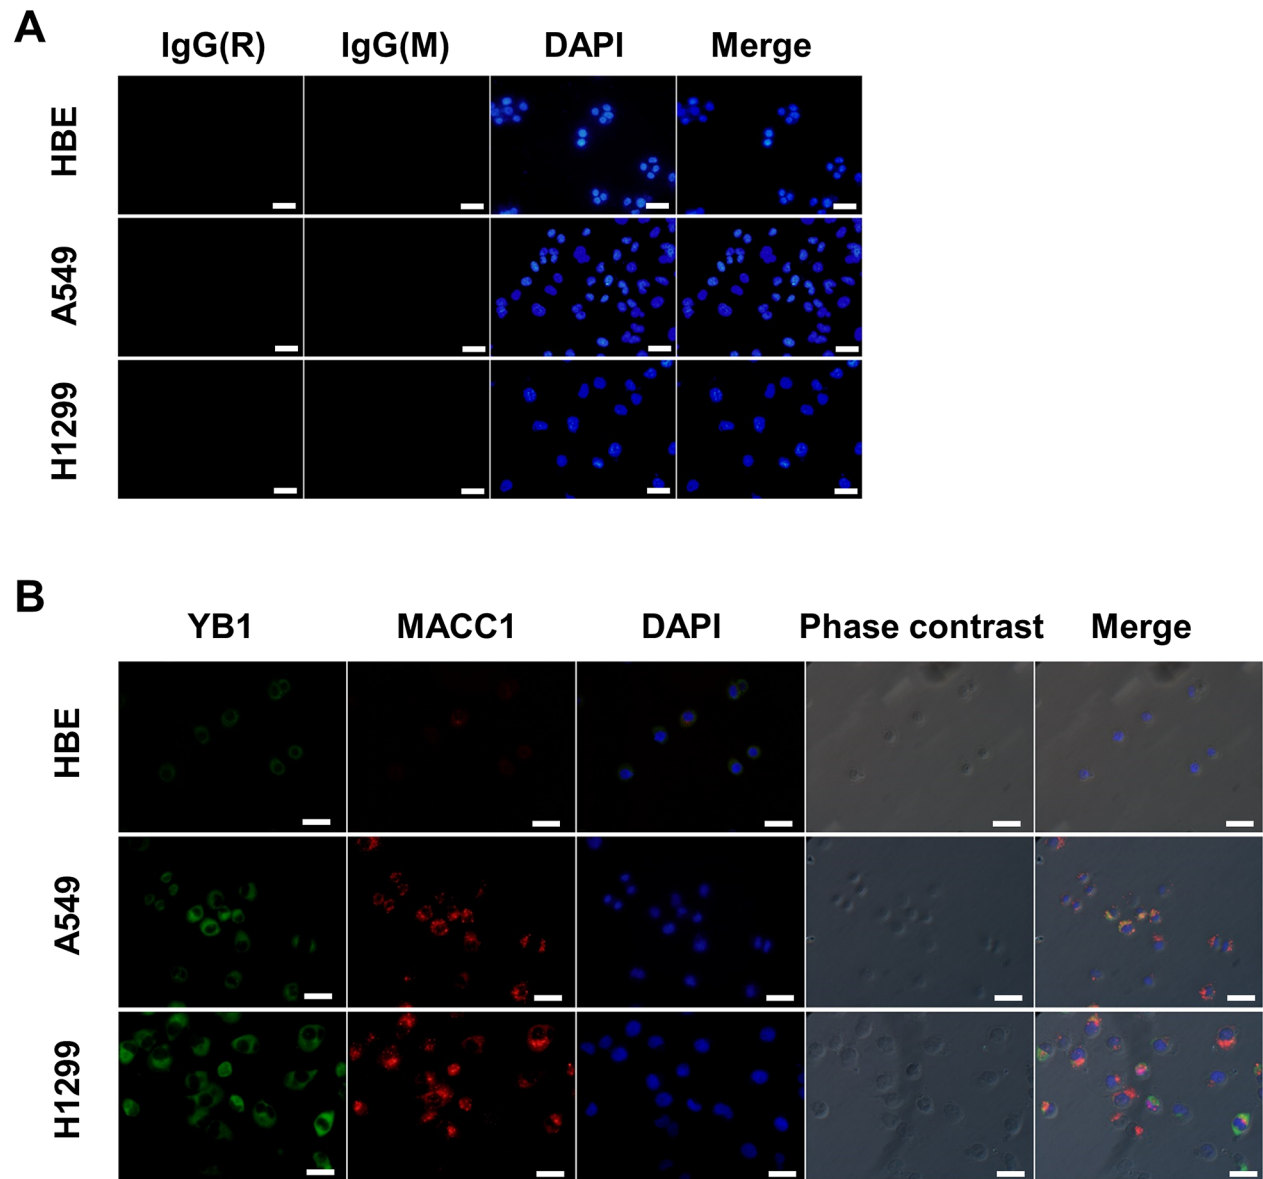

**Supplementary Figure 2: Co-localization of YB-1 and MACC1 in HBE, A549 and H1299 cells by immunofluorescence assay.** (A) The control images of Figure 5A. IgG (R): Rabbit IgG was used as the primary antibody; IgG (M): Mouse IgG was used as the primary antibody. (B) Immunofluorescence assay in HBE cells, A549 cells and H1299 cells. The results included companion phase contrast images were shown. Green: YB-1; Red: MACC1. Scale bars, 20  $\mu$ m.

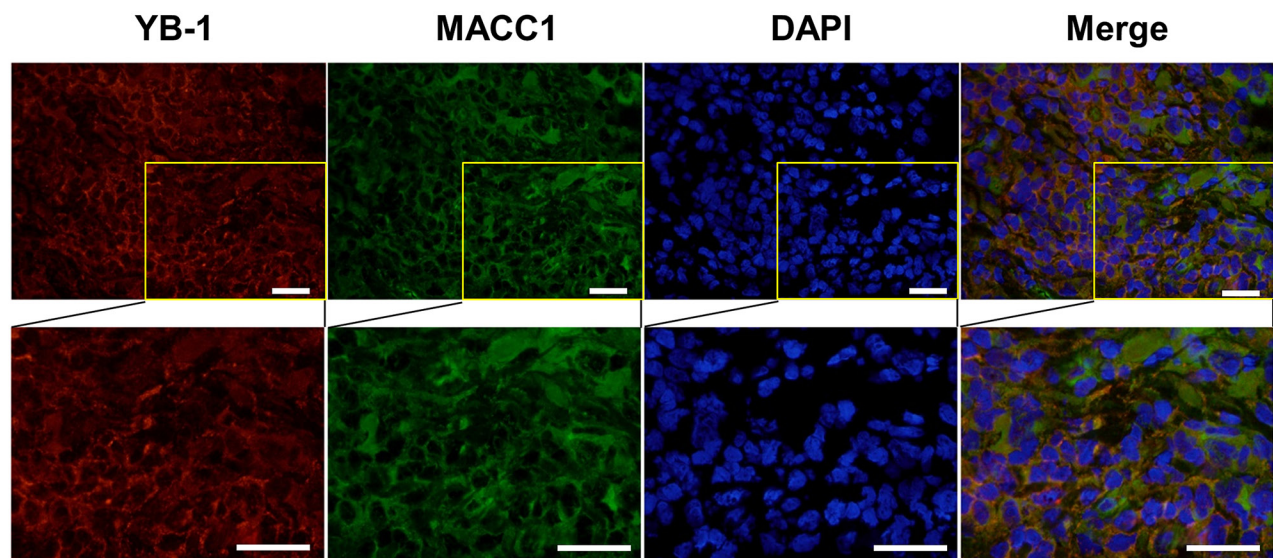

**Supplementary Figure 3: Co-localization of YB-1 and MACC1 in lung adenocarcinoma tissues by immunofluorescence assay.** Lung adenocarcinoma tissues were collected, frozen in O.C.T. compound, and sectioned. Slides were stained with primary YB-1 (red), MACC1 (green) antibody and DAPI. Representative images of cells from lung adenocarcinoma tissues are shown. Scale bars, 20  $\mu$ m.

**Supplementary Table 1: Sequences for primers**

| Identifier type                                                                | Sense sequence(5'-3')                   | Antisense sequence(5'-3')               |
|--------------------------------------------------------------------------------|-----------------------------------------|-----------------------------------------|
| <b>Primers used for PCR</b>                                                    |                                         |                                         |
| YB-1                                                                           | ACCACAGTATTCCATCCCTCCTG                 | ATCTTCTTCATTAGCCGTCCTCTC                |
| MACC1                                                                          | TTCTTTTGATTCTCCGGTGA                    | ACTCTGATGGGCATGTGCTG                    |
| ACTB                                                                           | CATGTACGTTGCTATCCAGGC                   | CTCCTTAATGTCACGCACGAT                   |
| <b>Primers used for generation of the MACC1 promoter luciferase constructs</b> |                                         |                                         |
| pGL3-MACC1<br>(-2020 to +262)                                                  | TTACGCGTGCCCGTAGATTAGATAA               | AACTCGAGGGCCCACAGAATACCAGTTA<br>CC      |
| pGL3-MACC1-<br>mutant1 (-1860 to<br>-1856)                                     | AAGTGCACAGCAGGGAGGGGAGCTGG<br>TAAACAGTG | CACTGTTTACCAGCTCCCCTCCCTGCTG<br>TGCACTT |
| pGL3-MACC1-<br>mutant2 (-1489 to<br>-1485)                                     | ACACACCCATGTAAACCGGTGAAATGA<br>GATATACA | TGTATATCTCATTTACCGGTTTACATGG<br>GTGTGT  |
| <b>Primers used for amplifying the MACC1 promoter sequence in ChIP assay</b>   |                                         |                                         |
| YB-1 binding site1                                                             | GGAGAAGGGATCCATAAATGC                   | ATTGAACCCTTGACAGTACCC                   |
| YB-1 binding site2                                                             | TAGGGATACAATGAGGCCTTGC                  | TCTGCATGGCATTCTCTCTCC                   |
